# Supplementary material
Source: publisher figshare collection journal article supplement (https://springernature.figshare.com/ndownloader/files/21835266)
Supplement: Supplementary file 1 [file 21835266]

Additional file 1

**The potential relationship between neurobehavioral and visual effects of BDE-209 on zebrafish larvae: A preliminary study**

Bin Zhang a,b, Daqiang Yin b,c,*, Ting Xu b,c,*, Sheng Wei b

a State Key Laboratory of Marine Geology, Tongji University, Shanghai 200092, China

b Key Laboratory of Yangtze River Water Environment, Ministry of Education, College of Environmental Science and Engineering, Tongji University, Shanghai 200092, China

c Shanghai Institute of Pollution Control and Ecological Security, Shanghai 200092, P. R. China

*Correspondence: xuting@tongji.edu.cn, yindq@tongji.edu.cn

**Table S1. Primer sequences used in qRT-PCR assay**

| Gene name | Sequence of the primer | Gene bank  accession No. |
| --- | --- | --- |
| *zfrho* | F: agccatgaacggtacagagg  R: cttcttgtgctcgatggtga | NM 131084 |
| *zfuv* | F: cctagcaggcttcattttcg  R: aagggtttgcagatgaccac | NM 131319 |
| *zfred* | F: ctgcactgtggtcgttgact  R: gaggccagtatctgctccag | NM 131175 |
| *zfblue* | F: cagcttacagccctttcctg  R: caagttggaaatggcaaggt | NM 131192 |
| *zfgr1* | F: aggctgagagggaagtgaca  R: tgttaagcatgcagctacgg | NM 131253 |
